# Supplementary material for: Conjugation with gold nanoparticles improves the stability of the KT2 peptide and maintains its anticancer properties
Source: Royal Society of Chemistry journal article supplement (doi:10.1039/d1ra05980g), 2021-12-20
Supplement: d1ra05980g1.pdf [file d1ra05980g1.pdf]

## Supporting Information

### **Conjugation with gold nanoparticles improves the stability of the KT2 peptide and maintains its anticancer properties**

*Pornsuda Maraming*<sup>1</sup>, *Jureerut Daduang*<sup>1,\*</sup>, *James Chen Yong Kah*<sup>2,\*</sup>

<sup>1</sup>Centre for Research and Development of Medical Diagnostic Laboratories, Faculty of  
Associated Medical Sciences, Khon Kaen University, Khon Kaen 40002, Thailand

<sup>2</sup> Department of Biomedical Engineering, National University of Singapore, 4 Engineering  
Drive 3, Blk E4, #04-08, Singapore 117583

\* Correspondence: [biekahj@nus.edu.sg](mailto:biekahj@nus.edu.sg) (J.C.Y.K); [jurpoo@kku.ac.th](mailto:jurpoo@kku.ac.th) (J.D.)

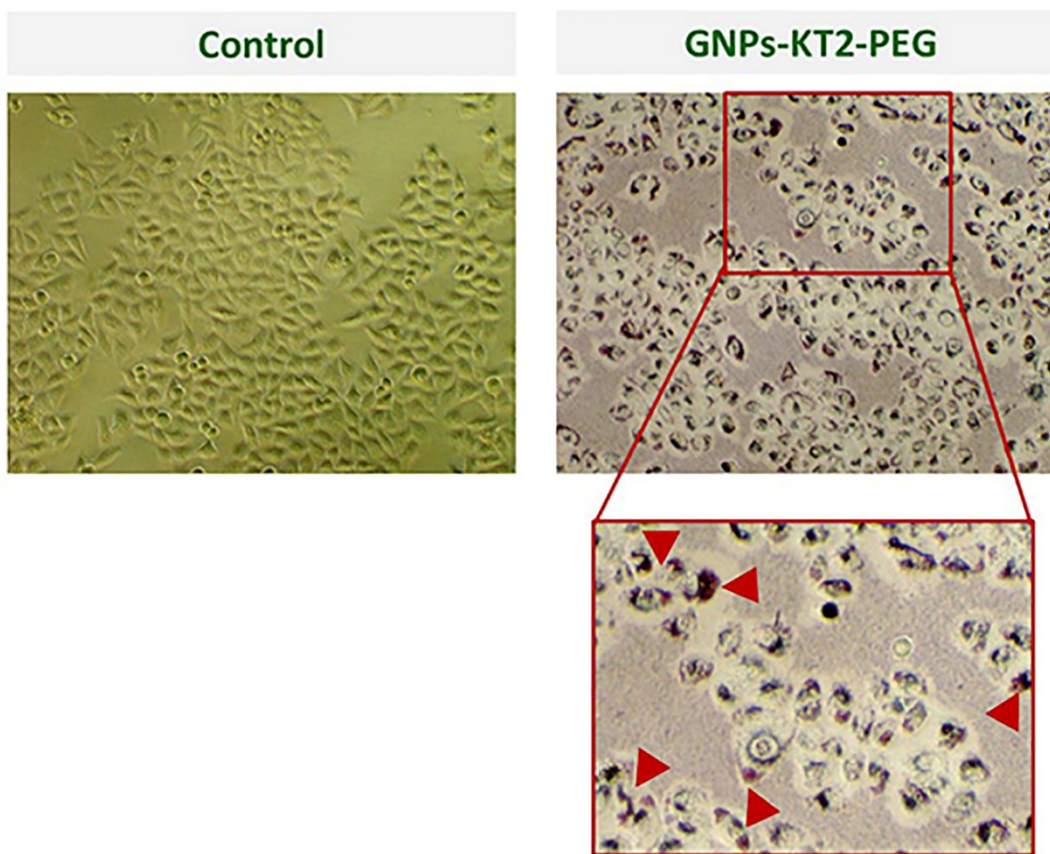

**Fig. S1** shows purple aggregated nanoparticles localized in cells under light microscope (400X). The cells were seeded at  $1 \times 10^4$  cells per well into a 96-well plate and incubated for 24 h before being treated with or without GNPs-KT2-PEG for 24 h.

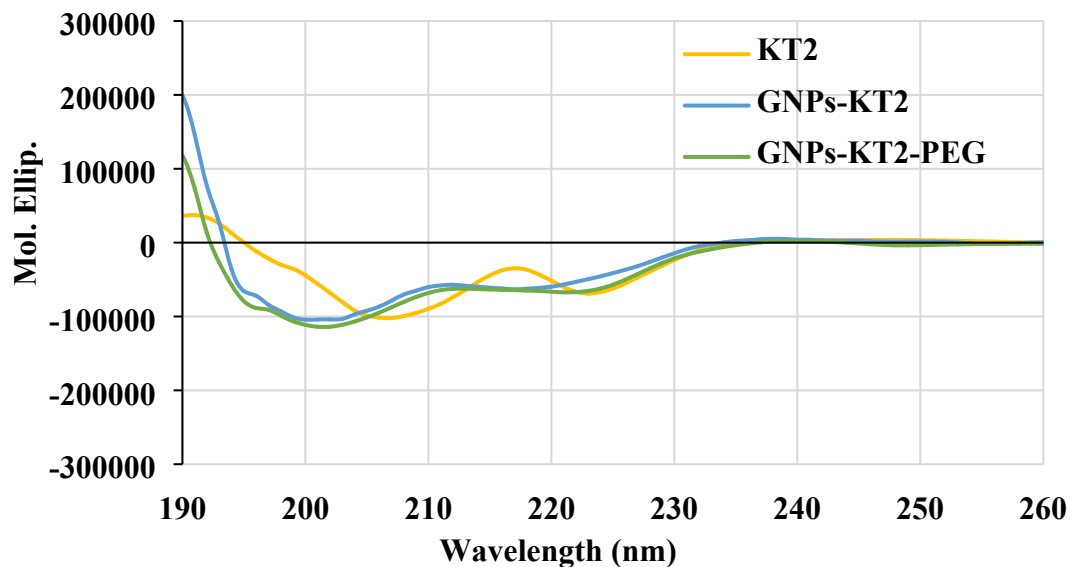

**Fig. S2** Circular dichroism studies on the protein secondary structure of KT2, GNPs-KT2, and GNPs-KT2-PEG. The average spectra were measured by a Jasco J-815 spectropolarimeter in the range 190–260 nm, using a 1 mm optical path length quartz cell at 25 °C. The parameters were set to 20 nm/min scanning speed at an interval of 0.1 nm, 1 s response time and 1.0 nm bandwidth.

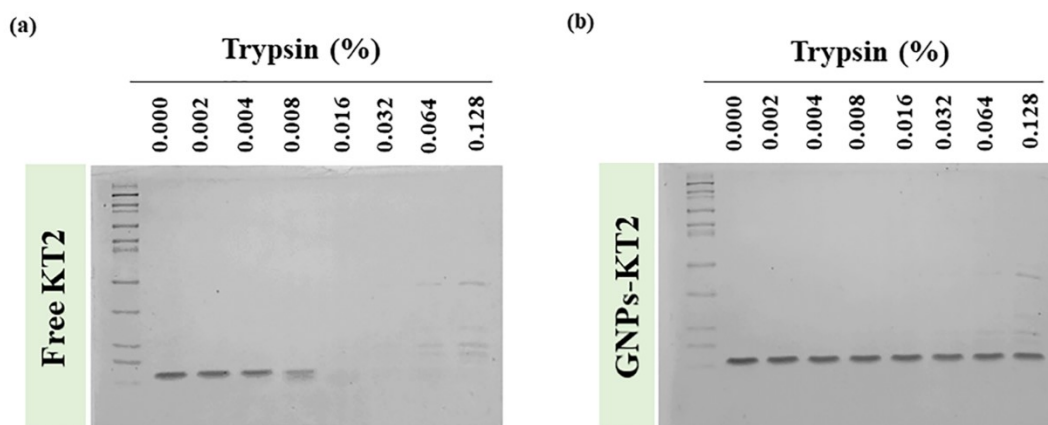

**Fig. S3** Stability of free and conjugated KT2 peptides under trypsin treatment. (A) Free KT2 peptides and (B) GNPs-KT2 with the same amount of KT2 peptides were exposed to a range of trypsin concentrations, and the amount of undigested KT2 peptides was visualized by SDS-PAGE followed by protein staining.
